# Supplementary material for: Nanoscale imaging of charge carrier transport in water splitting photoanodes
Source: PubMed Central journal article supplement (PMC6048052; doi:10.1038/s41467-018-04856-8), 2018-07-16
Supplement: 41467_2018_4856_MOESM2_ESM.pdf [file 41467_2018_4856_MOESM2_ESM.pdf]

## **Description of Additional Supplementary Files**

File Name: Supplementary Data 1

Description: Supplementary Dataset 1 includes all the data source for figures 2e-f, 3, 4.
